# Supplementary material for: Diagnostic Uncertainty and the Epidemiology of Feline Foamy Virus in Pumas (Puma concolor)
Source: PubMed Central journal article supplement (PMC6994588; doi:10.1038/s41598-020-58350-7), 2020-01-31
Supplement: 41598_2020_58350_MOESM1_ESM.pdf [file 41598_2020_58350_MOESM1_ESM.pdf]

1 **Diagnostic Uncertainty and the Epidemiology of Feline Foamy Virus in Pumas**  
2 **(*Puma concolor*)**

3

4 Nicholas G. Dannemiller<sup>a</sup>, Sarah Kechejian<sup>a</sup>, Simona Kraberger<sup>a</sup>, Kenneth Logan<sup>b</sup>,  
5 Mathew Alldredge<sup>c</sup>, Kevin R. Crooks<sup>d</sup>, Sue VandeWoude<sup>a</sup>, Scott Carver<sup>e</sup>

6

7 <sup>a</sup>Department of Microbiology, Immunology, and Pathology, Colorado State University,  
8 Fort Collins, Colorado, USA

9 <sup>b</sup>Colorado Parks and Wildlife, Montrose, Colorado, USA

10 <sup>c</sup>Colorado Parks and Wildlife, Fort Collins, Colorado, USA

11 <sup>d</sup>Department of Fish, Wildlife, and Conservation Biology, Colorado State University, Fort  
12 Collins, Colorado, USA

13 <sup>e</sup>School of Biological Sciences, University of Tasmania, Hobart, Tasmania, Australia

14

15 \*Address correspondence to Nicholas G. Dannemiller, dannemillern@gmail.com

16

17 **Supplementary Table S1. Results of qPCR and ELISA testing of naïve and experimentally FFV-**  
 18 **inoculated domestic cats.** Four specific-pathogen-free domestic cats were experimentally  
 19 inoculated with  $10^5$  TCID<sub>50</sub> wild-type FFV in 2 ml, split into 1 ml intramuscularly and 1 ml  
 20 intravenously. qPCR and ELISA testing of the 4 experimentally FFV-inoculated cats as well as 4  
 21 additional specific-pathogen-free, FFV-naïve domestic cats 21-days post inoculation yielded a  
 22 sensitivity of 75% (95% CI: 19.4-99.4%) and specificity of 100% (95% CI: 39.8-100%) for both  
 23 qPCR and ELISA. Data extrapolated from Ledesma-Feliciano et al (2018)<sup>28</sup>.

| Cat       | qPCR+ | qPCR- | ELISA+ | ELISA- |
|-----------|-------|-------|--------|--------|
| FFV+      | 3     | 1     | 3      | 1      |
| FFV Naïve | 0     | 4     | 0      | 4      |

24
